# Supplementary material
Source: Elsevier journal article supplement (https://www.sciencedirect.com/science/article/pii/S1885585723000713)
Supplement: mmc1 [file mmc1.pdf]

## **SUPPLEMENTARY DATA**

### **List of participating hospitals**

Hospital Universitari Vall d'Hebron Pediatric Cardiology, Barcelona, Spain; Hospital Clínic Universitario Lozano Blesa, Zaragoza, Spain; Hospital Universitario Miguel Servet, Zaragoza, Spain; Hospital Universitari Dr. Joseph Trueta, Girona, Spain; Hospital Universitari Son Espases Mallorca, Spain; Complejo Asistencial Universitario de Salamanca, Salamanca, Spain; Hospital Universitari Sant Joan de Reus, Reus, Spain; Hospital General Universitario de Ciudad Real, Ciudad Real, Spain; Hospital HM Nens, Barcelona, Spain; Hospital General Universitario Santa Lucía, Cartagena, Spain; Hospital 12 de Octubre, Madrid, Spain; Hospital Universitari Parc Taulí, Sabadell, Spain; Hospital HM Montepíncipe, Madrid, Spain; Hospital Virgen de la Salud, Toledo, Spain; Hospital Clínic Universitario de Valladolid, Valladolid, Spain; Hospital Universitario Virgen del Rocío, Sevilla, Spain; Complejo Hospitalario Universitario de Santiago de Compostela, Santiago de Compostela, A Coruña, Spain; Hospital de la Santa Creu i Sant Pau, Barcelona, Spain; Hospital de Mérida, Mérida, Badajoz, Spain; Hospital Universitario de Donostia, Donostia, Gipuzkoa, Spain; Hospital Universitario Río Hortega, Valladolid, Spain; Hospital Universitario Infanta Leonor, Madrid, Spain; Hospital Universitario Príncipe de Asturias, Madrid, Spain; Complejo Asistencial Universitario de Palencia, Palencia, Spain; Hospital San Pedro, Logroño, La Rioja, Spain; Hospital Universitario Reina Sofía, Córdoba, Spain; Hospital General Segovia, Segovia, Spain; Hospital Universitari General de Catalunya, Barcelona, Spain; Hospital Lluís Alcanyis de Játiva, Valencia, Spain; Hospital Nuestra Señora de Sonsoles, Ávila, Spain; Hospital Universitario Infanta Elena, Madrid, Spain; Hospital de Jerez, Jerez de la Frontera, Cádiz, Spain; Hospital Costa del Sol, Marbella, Málaga, Spain; Hospital Sanitas La Zarzuela, Madrid, Spain.
